# Supplementary figures and images for: Bridging the implementation gap: youth-led priorities for supporting pregnant and mothering adolescents’ wellbeing and schooling
Source: Research Square preprint supplement (doi:10.21203/rs.3.rs-8104657/v1), 2026-01-12

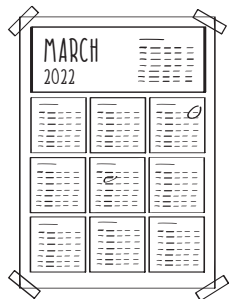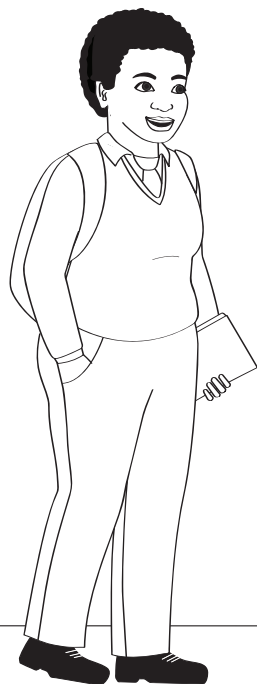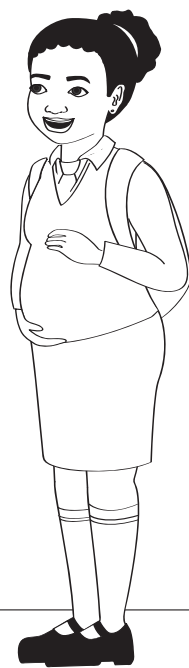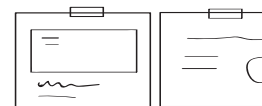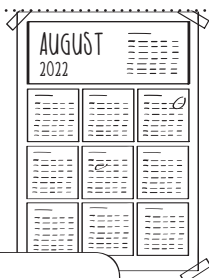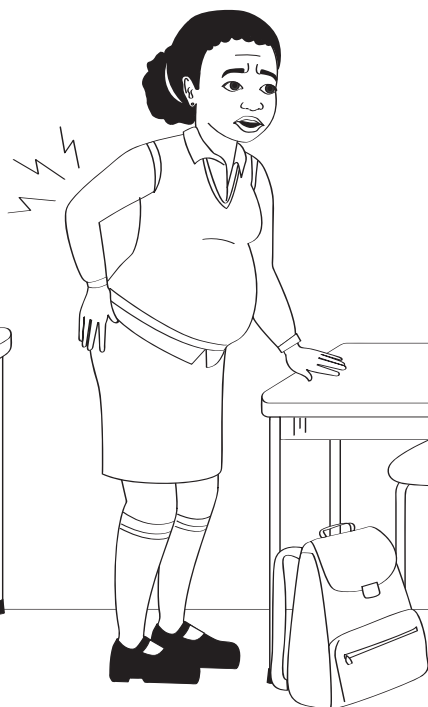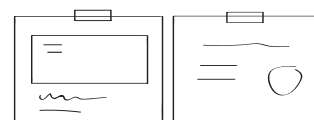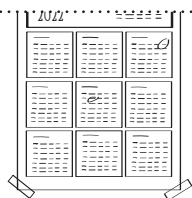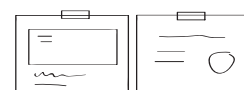

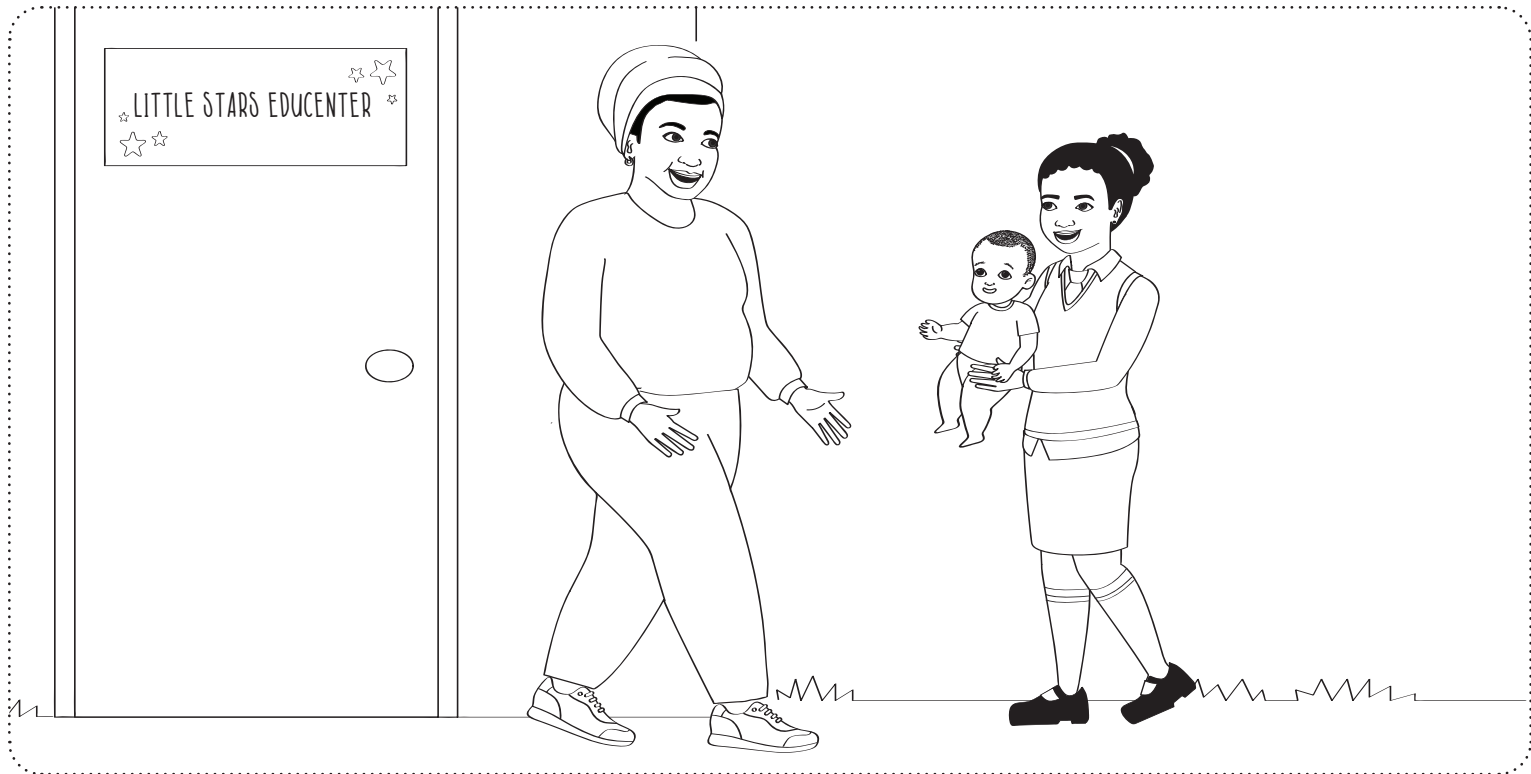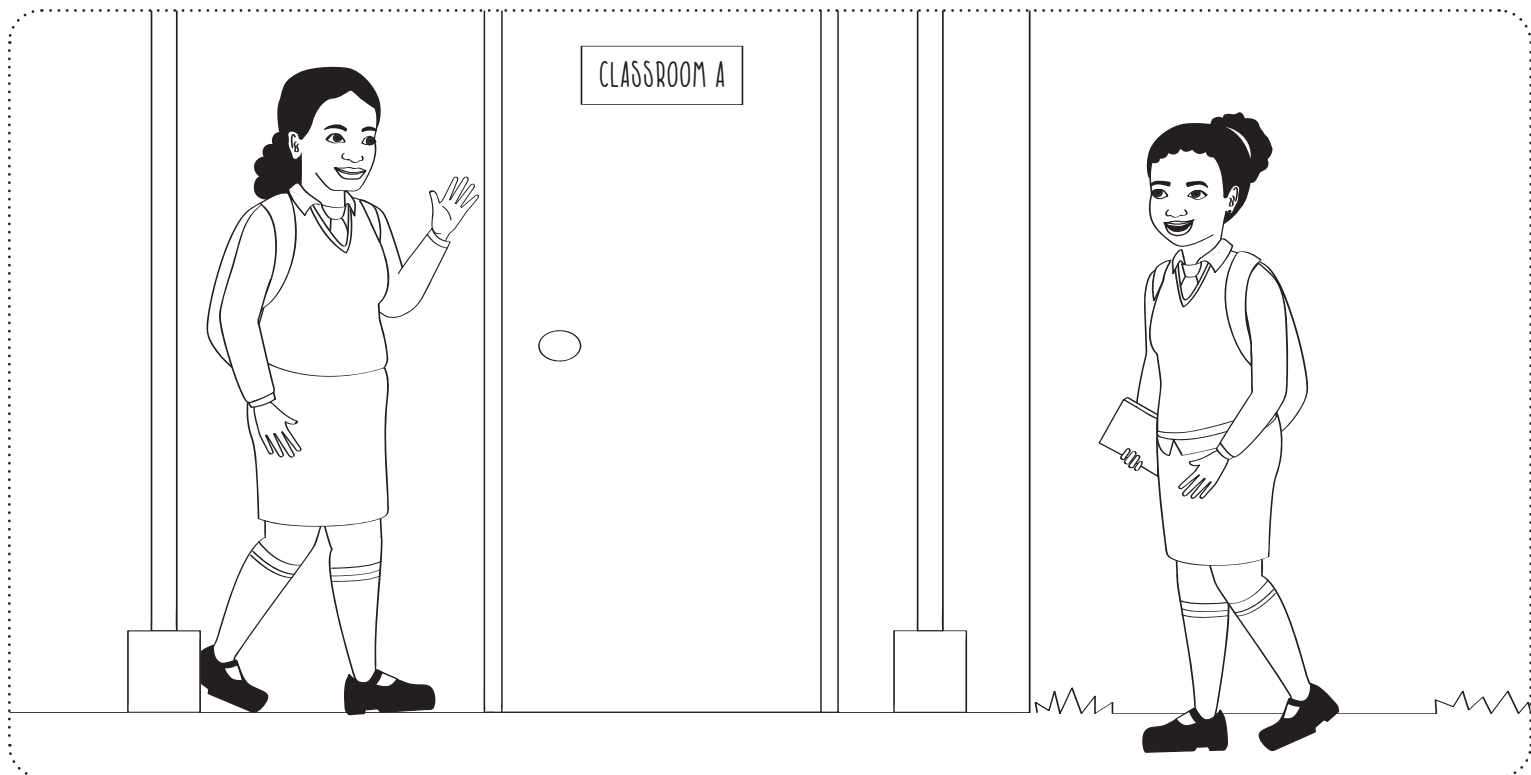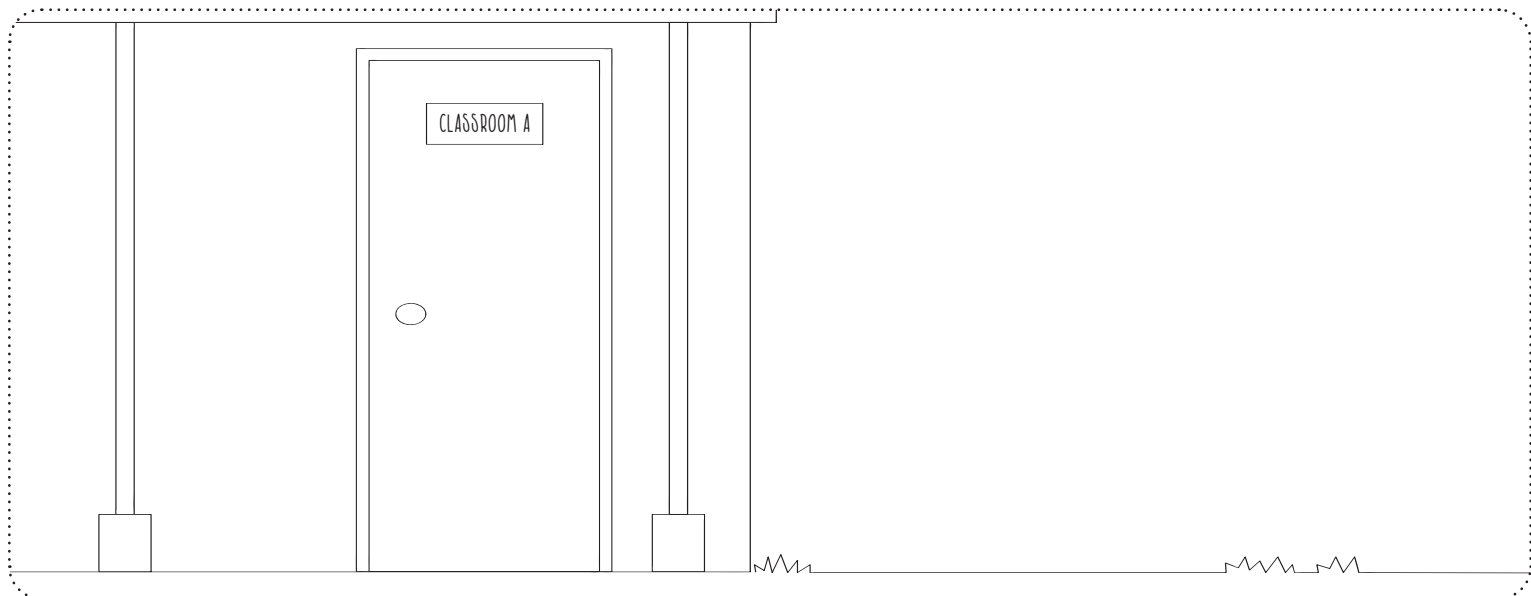

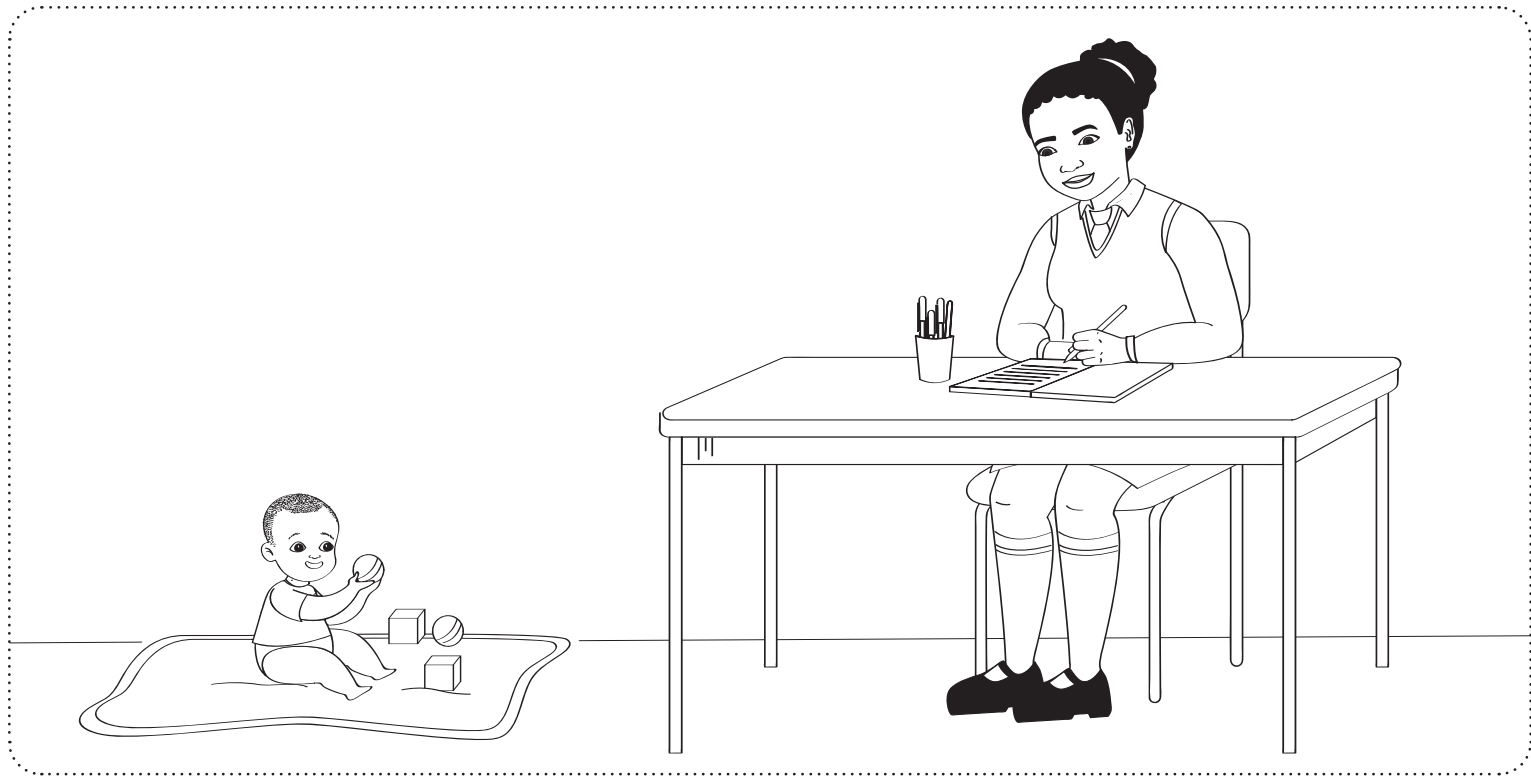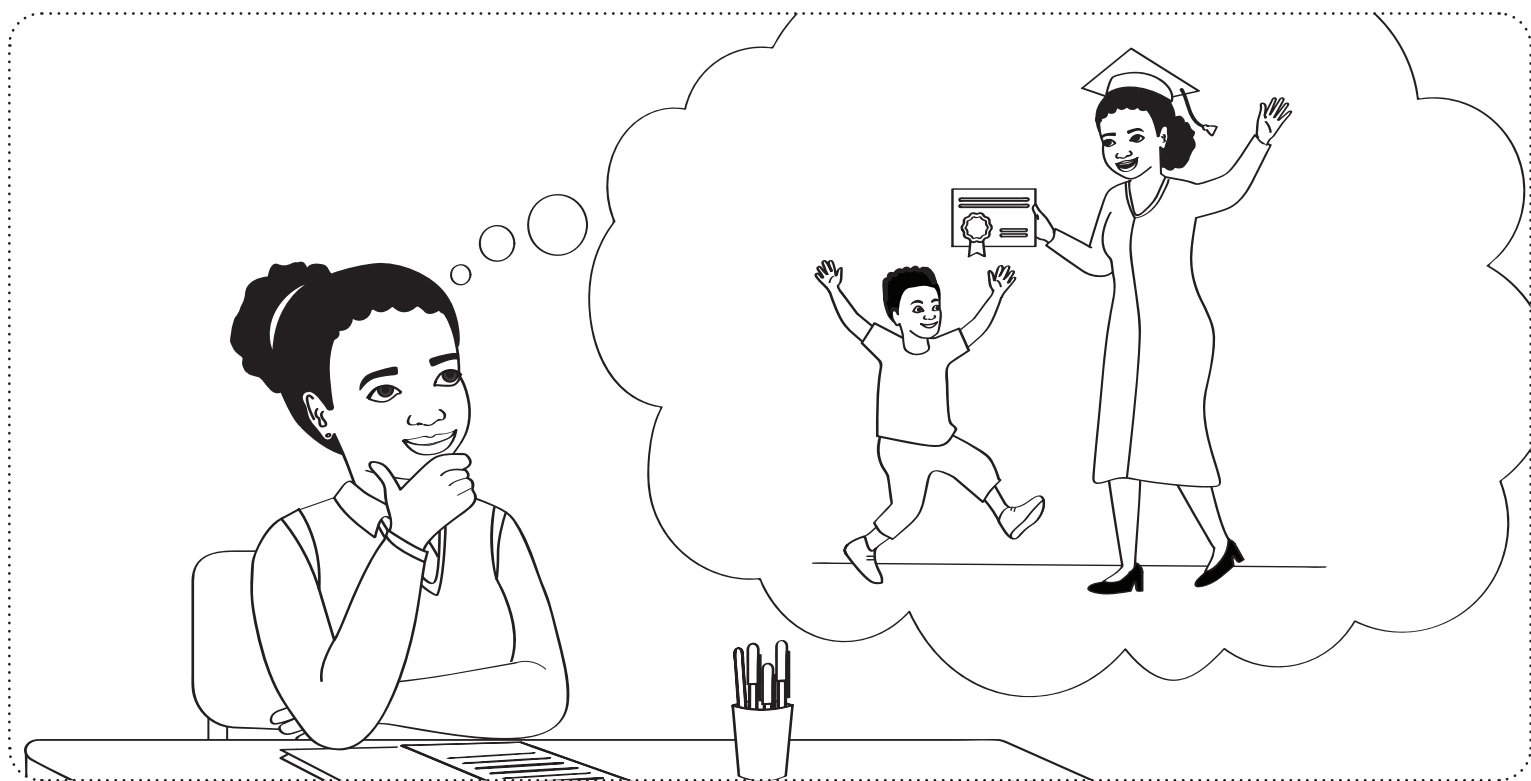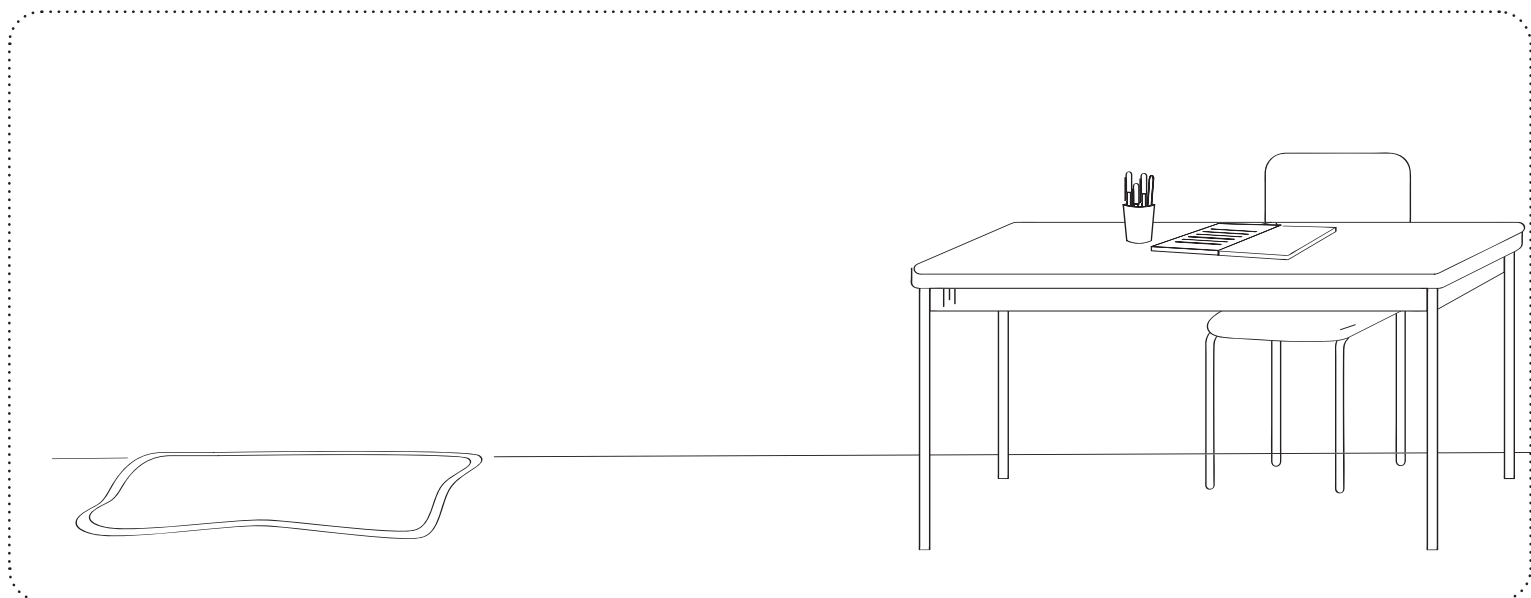

WN HEALTH CLINIC

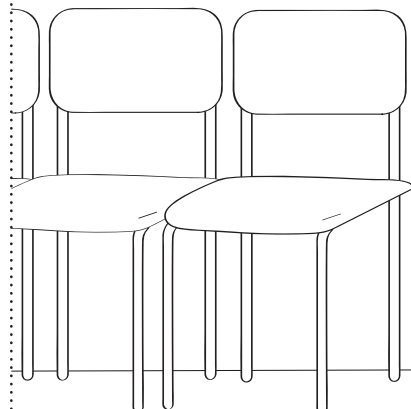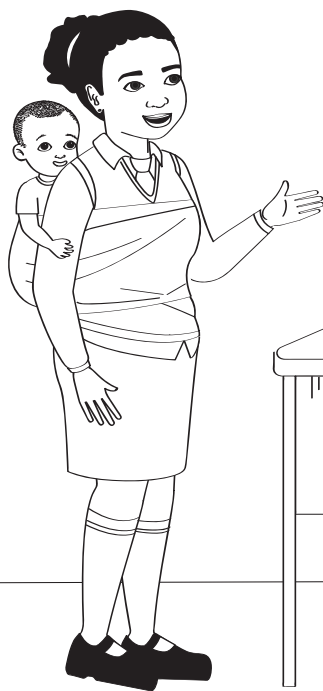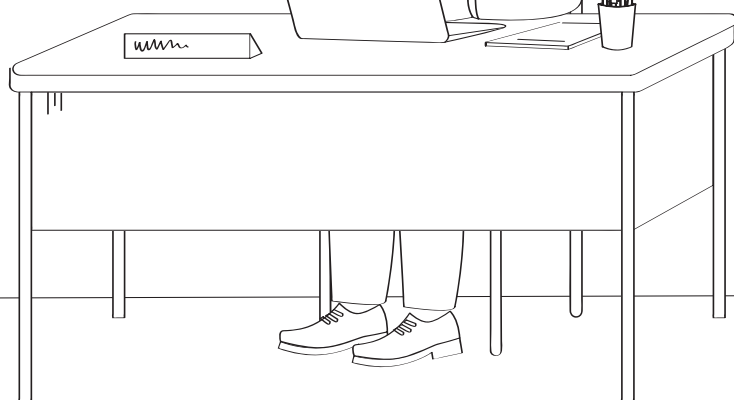

### CONTRACEPTIVE OPTIONS

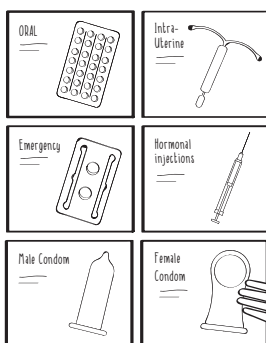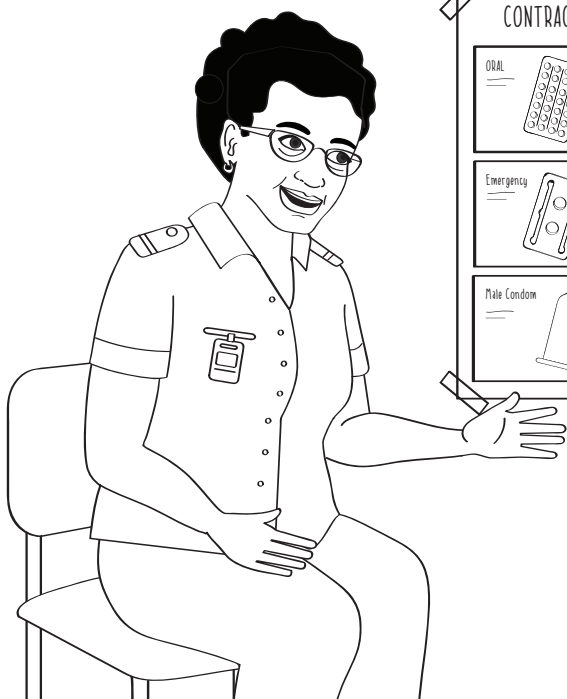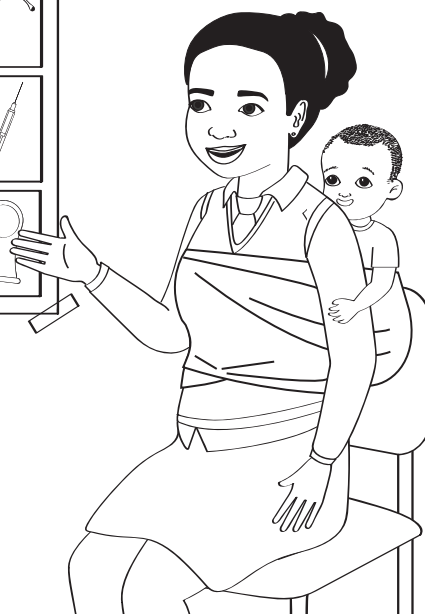

WN HEALTH CLINIC

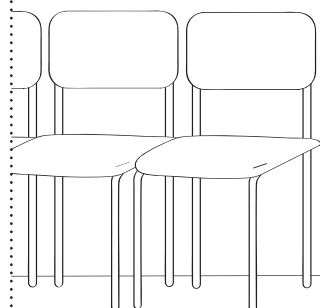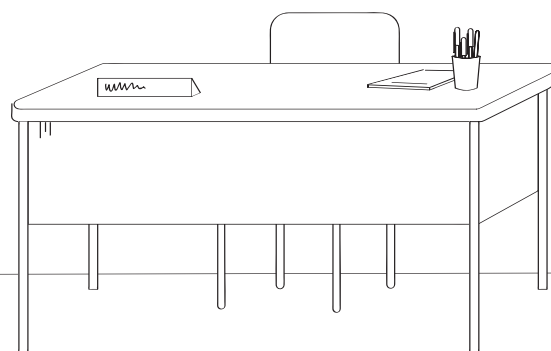

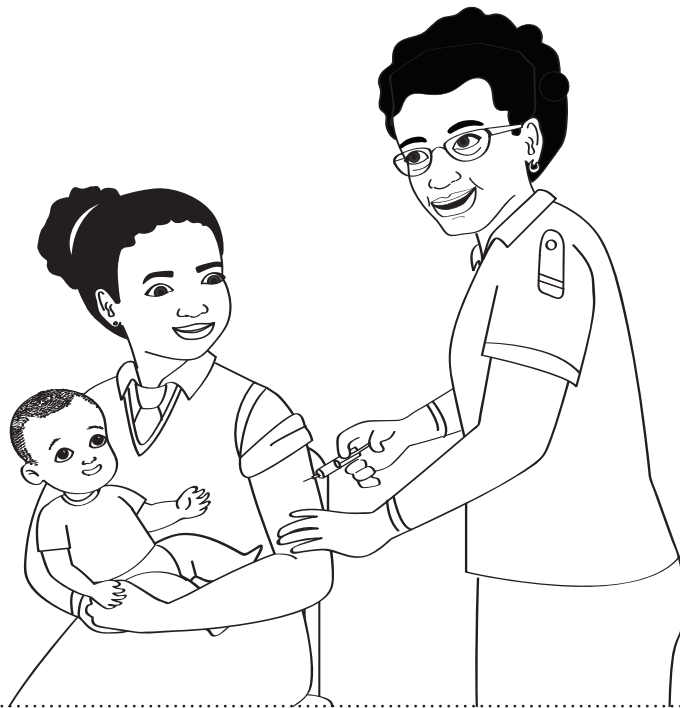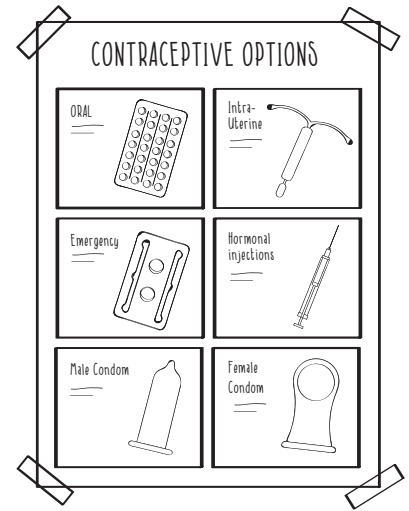

A YEAR LATER...

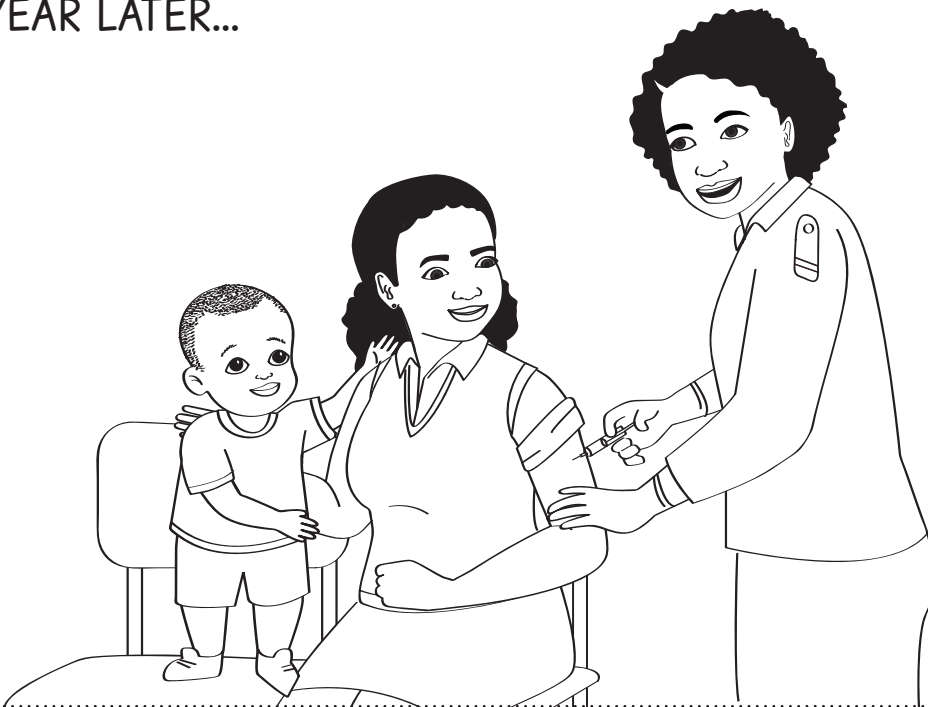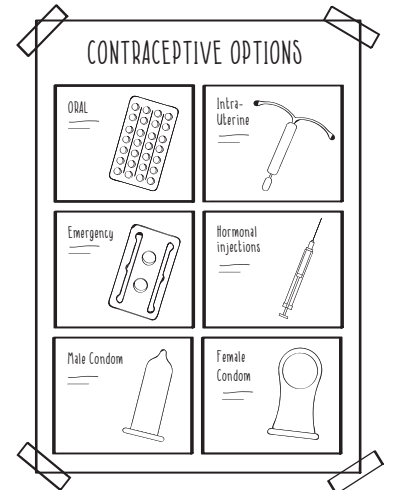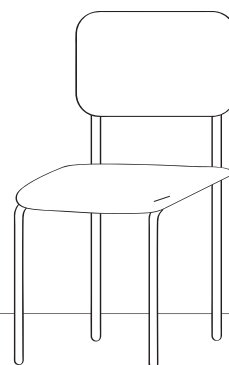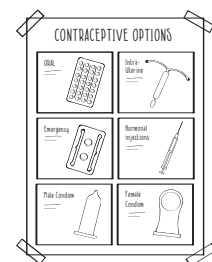

Supplement: Supplementary file 1 [file 514865110eaa442266630bf8.pdf]
